# Supplementary material
Source: PubMed Central journal article supplement (PMC7017408)
Supplement: ao9b03532_si_002.pdf [file ao9b03532_si_002.pdf]

## Supporting Information

# Conformational Heterogeneity and Self-Assembly of $\alpha,\beta,\gamma$ -Hybrid Peptides Containing Fenamic Acid: Multi-Stimuli Responsive Phase Selective Gelation

Srayoshi Roy Chowdhury,<sup>a</sup> Sujay Kumar Nandi,<sup>a</sup> Debasish Podder<sup>a</sup> and Debasish Haldar<sup>a\*</sup>

<sup>a</sup>*Department of Chemical Sciences, Indian Institute of Science Education and Research*

*Kolkata, Mohanpur, West Bengal 741246, India,*

Fax: (+)913325873020; Tel: +913325873119;

E-mail: deba\_h76@yahoo.com; deba\_h76@iiserkol.ac.in

### Table of contents

|                                                                               |        |
|-------------------------------------------------------------------------------|--------|
| 1. Figure S1                                                                  | S2     |
| 2. Figure S2                                                                  | S3     |
| 3. Figure S3                                                                  | S3     |
| 4. Figure S4                                                                  | S4     |
| 5. Figure S5                                                                  | S4     |
| 6. Figure S6                                                                  | S5     |
| 7. Figure S7                                                                  | S5     |
| 8. Table 1                                                                    | S5     |
| 9. Table 2                                                                    | S6     |
| 10. Table 3                                                                   | S7     |
| 11. <sup>1</sup> H, <sup>13</sup> C, Mass and FT-IR Spectrum of the Compounds | S8-S16 |

**(A) For Peptide 1 and Peptide 2**

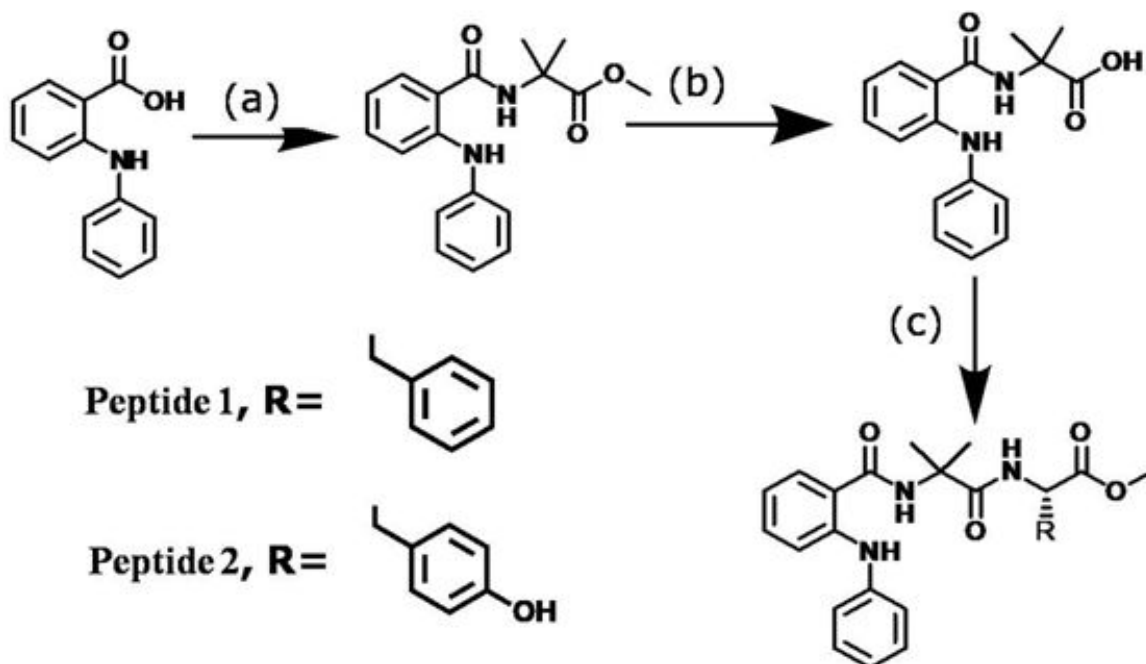

**(B) For Peptide 3**

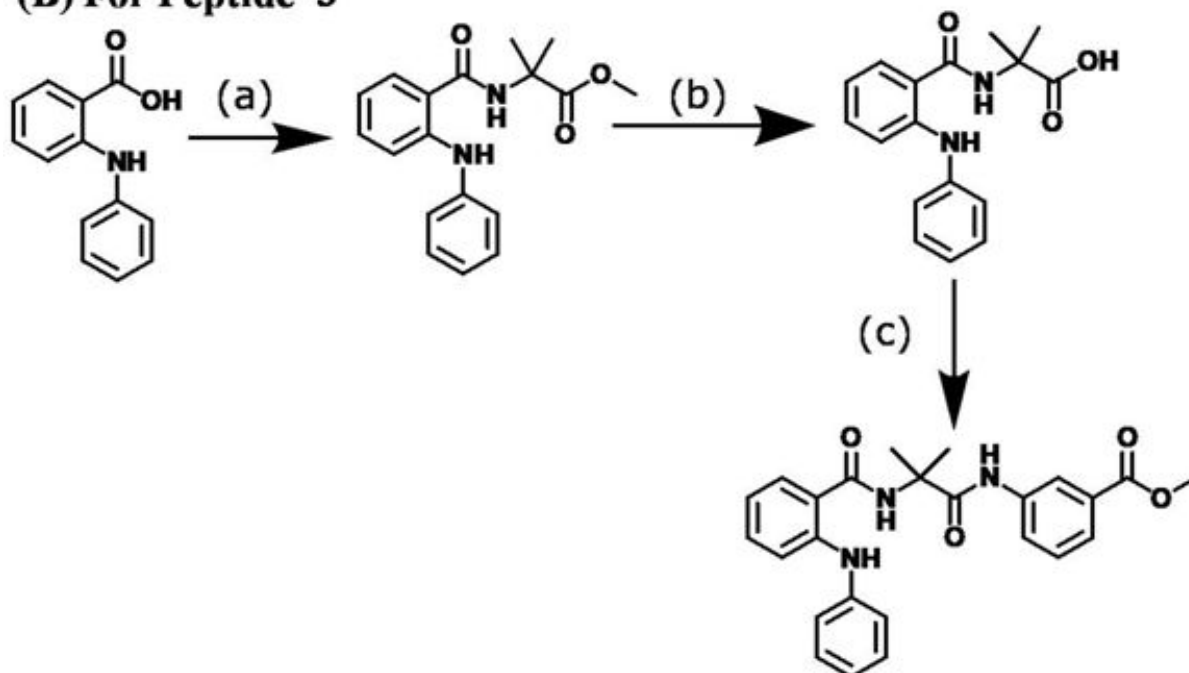

**Figure S1 (A):** Synthetic route of Peptide 1 and Peptide 2. (a) Dry DCM, H-Aib-OMe, DCC, 48h, rt; (b) 2(N) NaOH, MeOH, 12h, rt; (c) Dry DCM, DCC, HOBT, H-Phe-OMe, 48h, rt (for peptide 1), H-Tyr-OMe (for peptide 2). **(B):** Synthetic route of Peptide 3 (B). (a) Dry DCM, H-Aib-OMe, DCC, 48h, rt; (b) 2(N) NaOH, MeOH, 12h, rt; (c) Dry DCM, DCC, 48h, rt, Maba-OMe (for peptide 3).

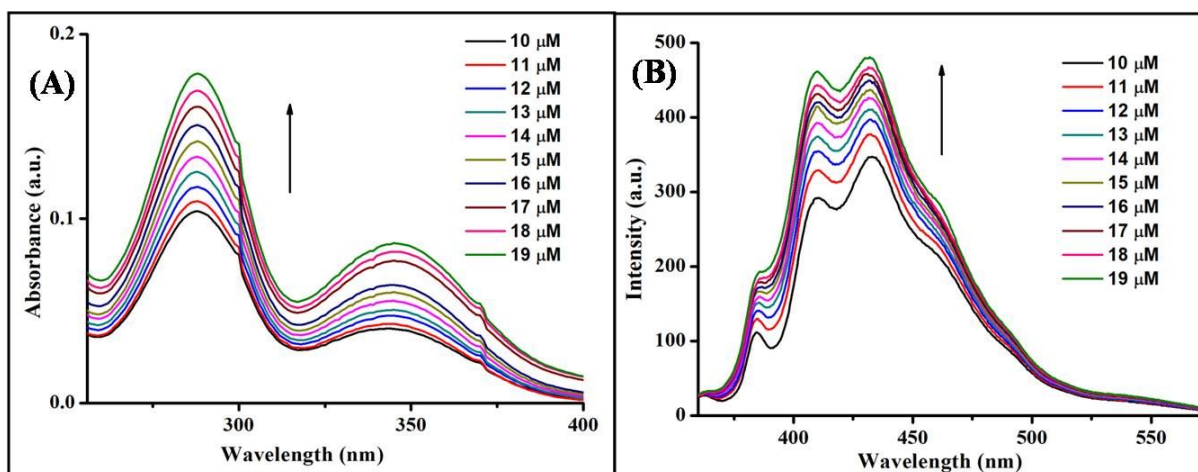

**Figure S2 :** (A) Concentration dependent UV-Vis spectra and (B) Concentration dependent Fluorescence spectra [excitation at 346 nm] in MeOH of Peptide 1.

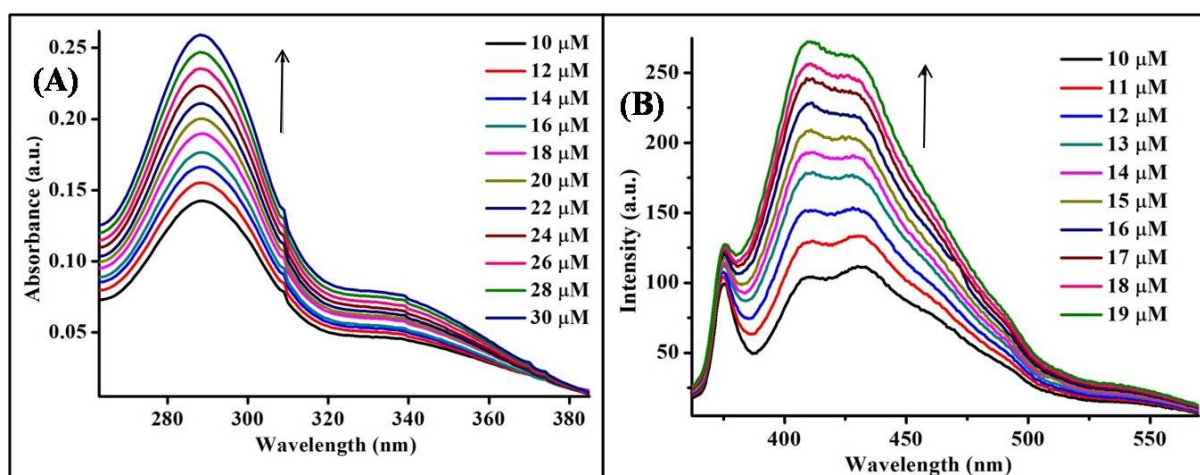

**Figure S3 :** (A) Concentration dependent UV-Vis spectra and (B) Concentration dependent Fluorescence spectra [excitation at 338 nm] in MeOH of Peptide 2.

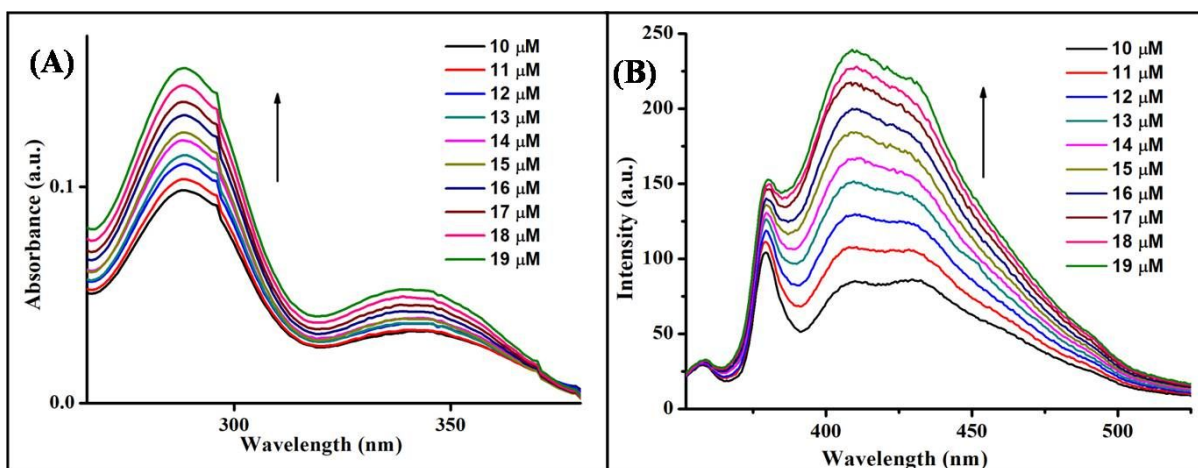

**Figure S4 :** (A) Concentration dependent UV-Vis spectra and (B) Concentration dependent Fluorescence spectra [excitation at 342 nm] in MeOH of Peptide 3.

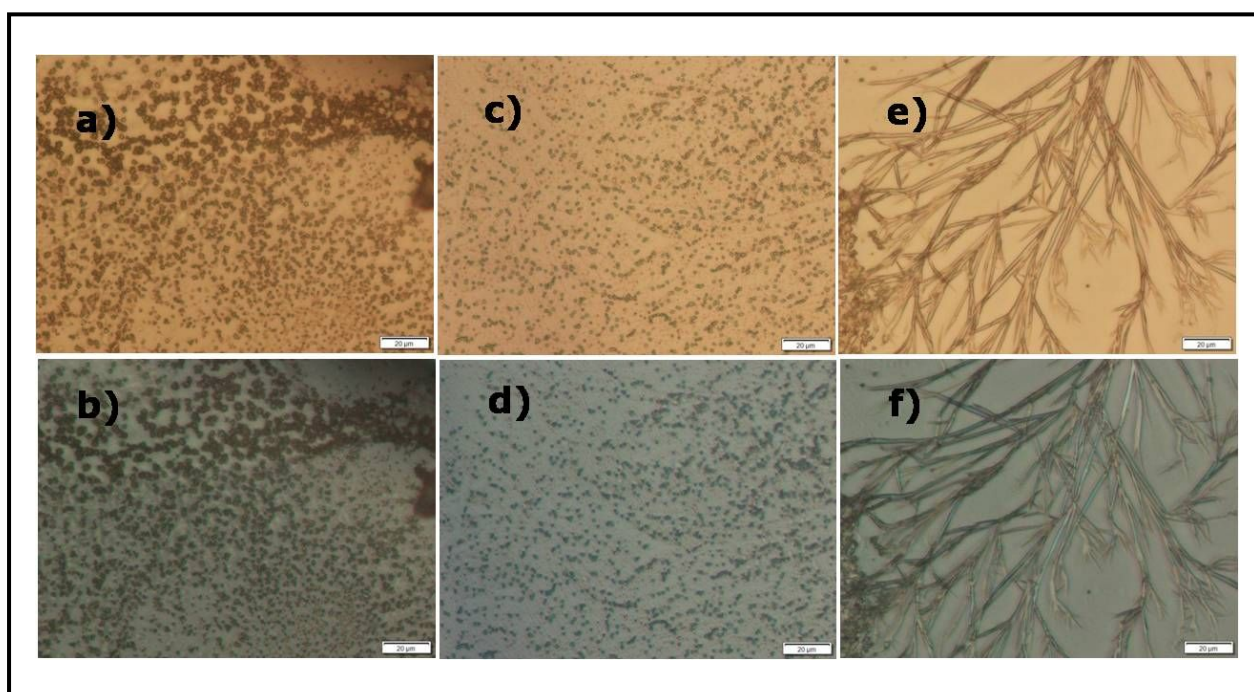

**Figure S5:** POM image of peptide 1 (a) without polarizer and (b) with polarizer; POM image of peptide 2 (c) without polarizer and (d) with polarizer, POM image of peptide 3 (e) without polarizer and (f).with polarizer.

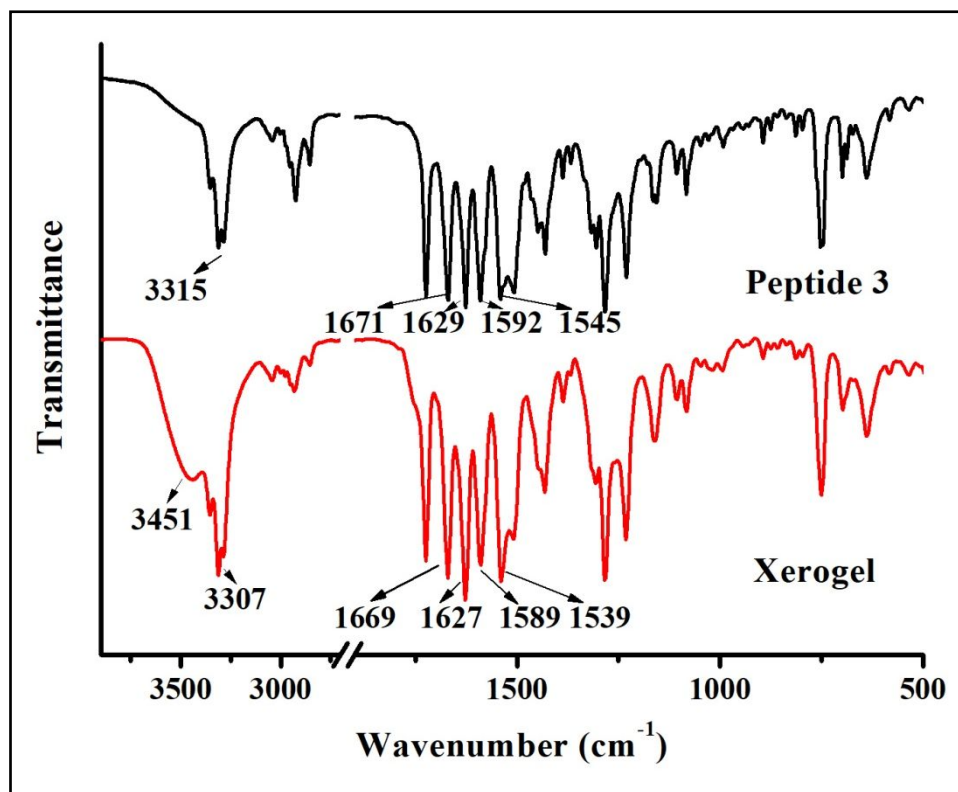

Figure S6: FT-IR Spectra of Peptide 3 and its xerogel.

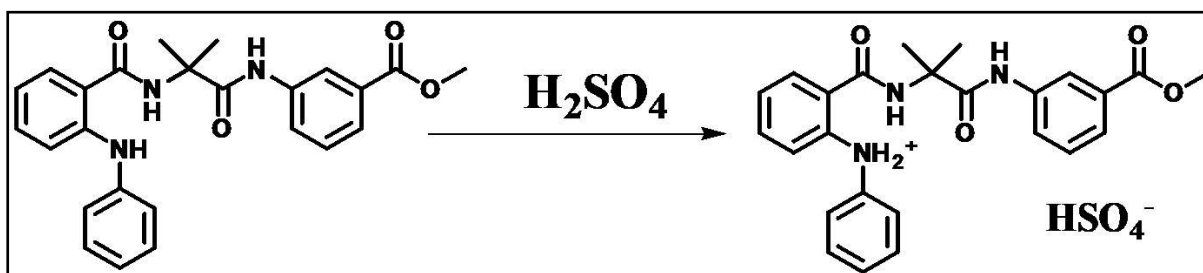

Figure S7: The plausible effect of  $\text{H}_2\text{SO}_4$  on peptide 3 gel to sol transition and phase transfer.

Table S1. Crystal data and structure refinement for Peptide 1.

|                     |                                                     |
|---------------------|-----------------------------------------------------|
| Identification code | NPAP                                                |
| Empirical formula   | $\text{C}_{27} \text{H}_{29} \text{N}_3 \text{O}_4$ |
| Formula weight      | 459.53                                              |
| Temperature/K       | 298                                                 |
| Crystal system      | monoclinic                                          |
| Space group         | P 1 21 1                                            |
| a/Å                 | 6.9113                                              |
| b/Å                 | 18.1972                                             |
| c/Å                 | 10.1370                                             |
| $\alpha/^\circ$     | 90                                                  |

|                                               |                                                               |
|-----------------------------------------------|---------------------------------------------------------------|
| $\beta/^\circ$                                | 105.648                                                       |
| $\gamma/^\circ$                               | 90                                                            |
| Volume/ $\text{\AA}^3$                        | 1227.64                                                       |
| Z                                             | 2                                                             |
| $\rho_{\text{calc}}/\text{cm}^3$              | 1.243                                                         |
| $\mu/\text{mm}^{-1}$                          | 0.084                                                         |
| F(000)                                        | 488.0                                                         |
| Crystal size/ $\text{mm}^3$                   | $0.2458 \times 0.2358 \times 0.1587$                          |
| Radiation                                     | MoK $\alpha$ ( $\lambda = 0.71073$ )                          |
| $2\Theta$ range for data collection/ $^\circ$ | 4.172 to 50.044                                               |
| Index ranges                                  | $-8 \leq h \leq 8, -21 \leq k \leq 21, -12 \leq l \leq 12$    |
| Reflections collected                         | 10027                                                         |
| Independent reflections                       | 4315 [ $R_{\text{int}} = 0.0331, R_{\text{sigma}} = 0.0427$ ] |
| Data/restraints/parameters                    | 4315/1/310                                                    |
| Goodness-of-fit on $F^2$                      | 1.088                                                         |
| Final R indexes [ $I \geq 2\sigma(I)$ ]       | $R_1 = 0.0470, wR_2 = 0.1506$                                 |
| Final R indexes [all data]                    | $R_1 = 0.0534, wR_2 = 0.1574$                                 |
| Largest diff. peak/hole / $e \text{\AA}^{-3}$ | 0.21/-0.17                                                    |
| Flack parameter                               | 0.25(3)                                                       |

**Table S2.** Crystal data and structure refinement for Peptide **2**.

|                                               |                                                     |
|-----------------------------------------------|-----------------------------------------------------|
| Identification code                           | NPAT                                                |
| Empirical formula                             | $\text{C}_{27} \text{H}_{29} \text{N}_3 \text{O}_5$ |
| Formula weight                                | 475.53                                              |
| Temperature/K                                 | 100.01                                              |
| Crystal system                                | monoclinic                                          |
| Space group                                   | P 1 21 1                                            |
| a/ $\text{\AA}$                               | 6.9049                                              |
| b/ $\text{\AA}$                               | 17.9673                                             |
| c/ $\text{\AA}$                               | 10.1305                                             |
| $\alpha/^\circ$                               | 90                                                  |
| $\beta/^\circ$                                | 106.637                                             |
| $\gamma/^\circ$                               | 90                                                  |
| Volume/ $\text{\AA}^3$                        | 1204.20                                             |
| Z                                             | 2                                                   |
| $\rho_{\text{calc}}/\text{cm}^3$              | 1.311                                               |
| $\mu/\text{mm}^{-1}$                          | 0.091                                               |
| F(000)                                        | 506.0                                               |
| Crystal size/ $\text{mm}^3$                   | $0.248 \times 0.187 \times 0.107$                   |
| Radiation                                     | MoK $\alpha$ ( $\lambda = 0.71073$ )                |
| $2\Theta$ range for data collection/ $^\circ$ | 4.196 to 50.04                                      |

|                                                |                                                               |
|------------------------------------------------|---------------------------------------------------------------|
| Index ranges                                   | $-8 \leq h \leq 7, -21 \leq k \leq 10, -4 \leq l \leq 12$     |
| Reflections collected                          | 3435                                                          |
| Independent reflections                        | 2739 [ $R_{\text{int}} = 0.0337, R_{\text{sigma}} = 0.0502$ ] |
| Data/restraints/parameters                     | 2739/1/320                                                    |
| Goodness-of-fit on $F^2$                       | 0.971                                                         |
| Final R indexes [ $I \geq 2\sigma(I)$ ]        | $R_1 = 0.0423, wR_2 = 0.1229$                                 |
| Final R indexes [all data]                     | $R_1 = 0.0455, wR_2 = 0.1275$                                 |
| Largest diff. peak/hole / $e \text{ \AA}^{-3}$ | 0.49/-0.37                                                    |
| Flack parameter                                | -1.0(10)                                                      |

**Table S3.** Crystal data and structure refinement for Peptide **3**.

|                                                   |                                      |
|---------------------------------------------------|--------------------------------------|
| Identification code                               | NPAM                                 |
| Empirical formula                                 | $C_{25} H_{25} N_3 O_4$              |
| Formula weight                                    | 431.48                               |
| Temperature/K                                     | 273                                  |
| Crystal system                                    | monoclinic                           |
| Space group                                       | P 1 21/c 1                           |
| a/ $\text{\AA}$                                   | 13.2844                              |
| b/ $\text{\AA}$                                   | 9.4272                               |
| c/ $\text{\AA}$                                   | 36.075                               |
| $\alpha/^\circ$                                   | 90                                   |
| $\beta/^\circ$                                    | 93.302                               |
| $\gamma/^\circ$                                   | 90                                   |
| Volume/ $\text{\AA}^3$                            | 4510.4                               |
| Z                                                 | 8                                    |
| $\rho_{\text{calc}}/\text{cm}^3$                  | 1.271                                |
| $\mu/\text{mm}^{-1}$                              | 0.709                                |
| F(000)                                            | 1824                                 |
| Crystal size/ $\text{mm}^3$                       | -                                    |
| Radiation                                         | CuK $\alpha$ ( $\lambda = 1.54178$ ) |
| Theta Min-Max / $^\circ$                          | 2.5, 68.0                            |
| Dataset                                           | -15: 15 ; -10: 11 ; -43: 43          |
| Tot., Uniq. Data, R(int)                          | 49064, 8166, 0.153                   |
| Observed data [ $I > 2.0 \text{ sigma}(I)$ ]      | 5419                                 |
| Nref, Npar                                        | 8166, 584                            |
| Final R indexes [ $I \geq 2\sigma(I)$ ]           | $R_1 = 0.1315, wR_2 = 0.3302$        |
| Final R indexes [all data]                        | $R_1 = 0.1735, wR_2 = 0.3429$        |
| Min. and Max. Resd. Dens.<br>[ $e/\text{\AA}^3$ ] | -0.64, 0.83                          |

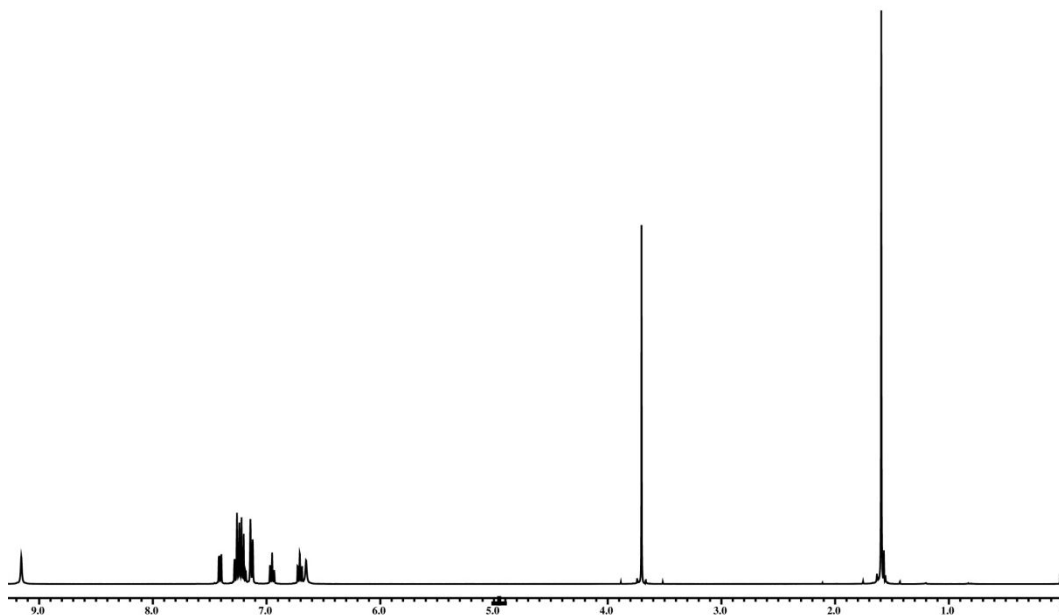

**Figure S8.** <sup>1</sup>H NMR (400 MHz, CDCl<sub>3</sub>) spectrum of Fenamic acid- Aib OMe (NPA-Aib-OMe) 4.

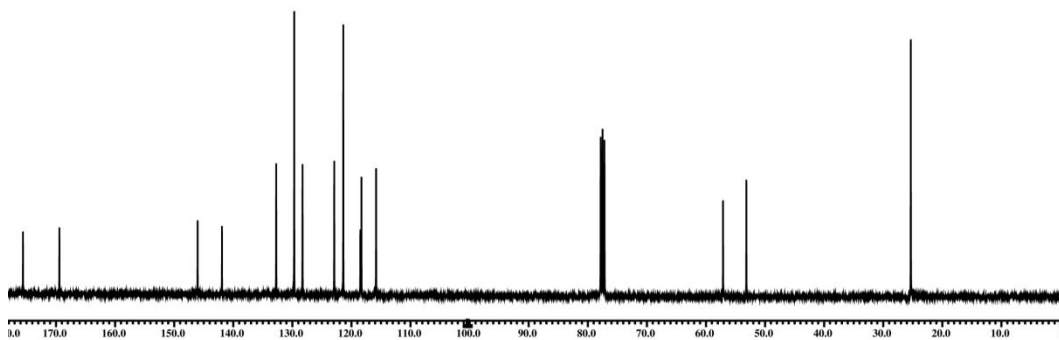

**Figure S9.** <sup>13</sup>C NMR (100 MHz, CDCl<sub>3</sub>) spectrum of Fenamic acid- Aib OMe (NPA-Aib-OMe) 4.



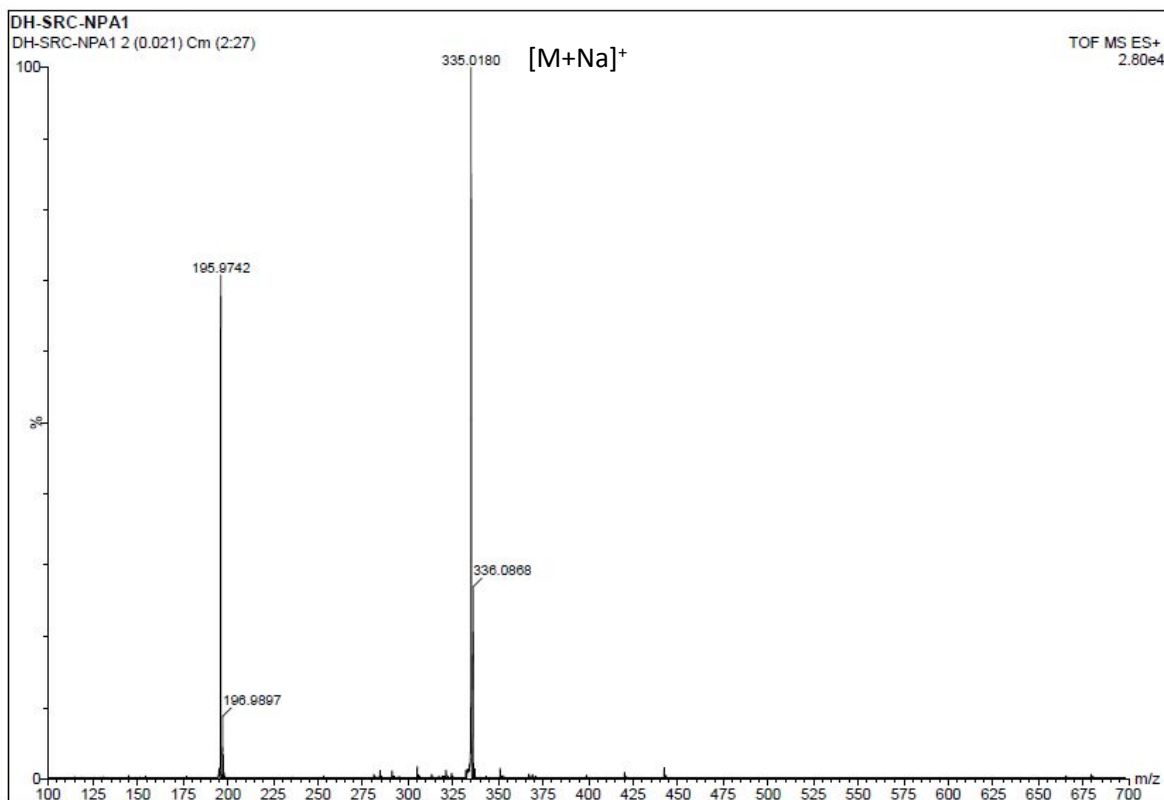

Figure S10. Mass spectrum of Fenamic acid- Aib OMe (NPA-Aib-OMe) 4.

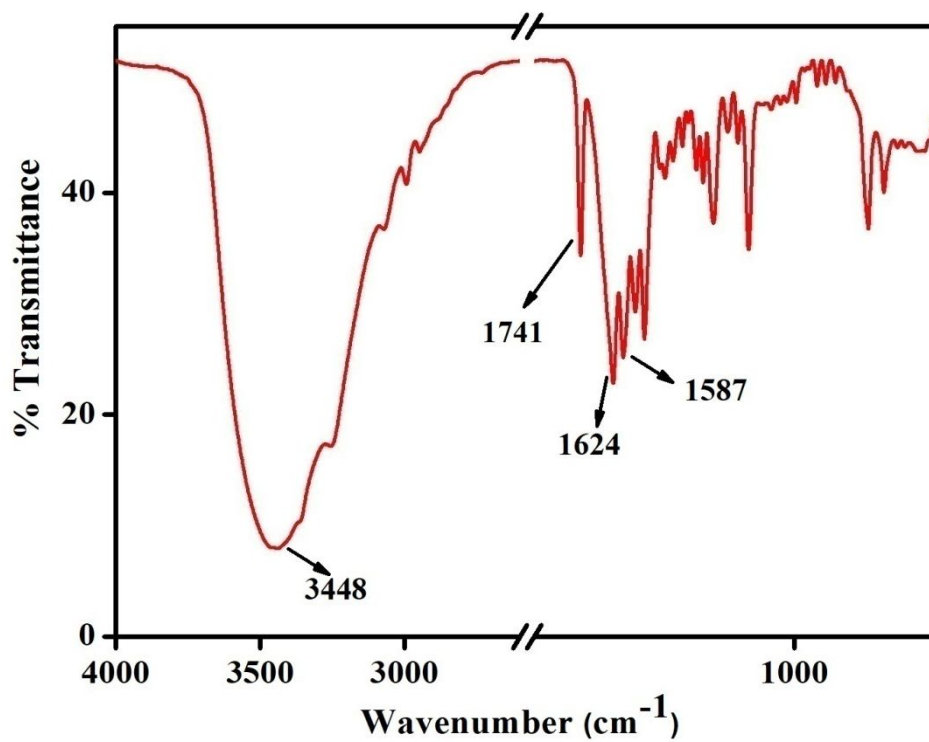

Figure S11. FT-IR spectrum of Fenamic acid- Aib OMe (NPA-Aib-OMe) 4.

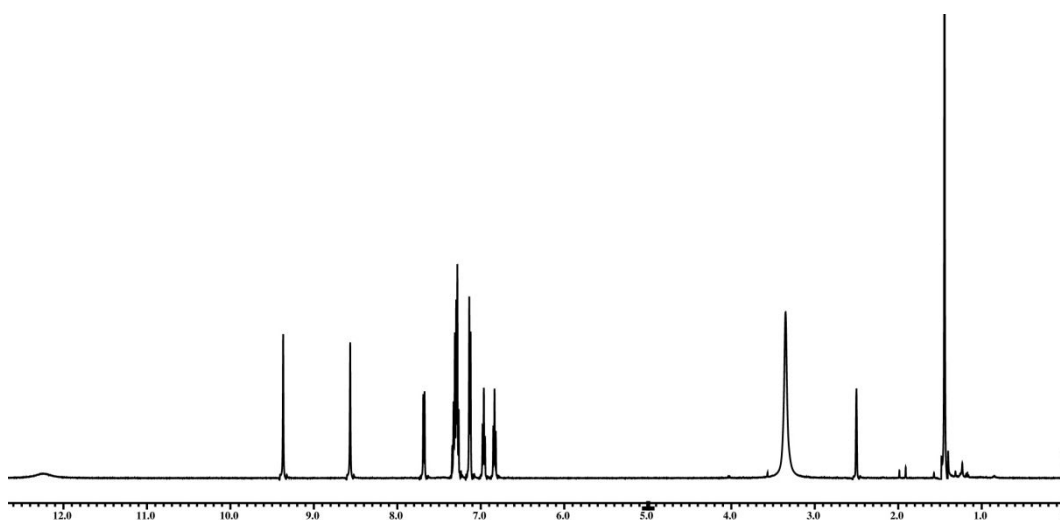

**Figure S12.** <sup>1</sup>H NMR (500 MHz, DMSO-d<sub>6</sub>) spectrum of Fenamic acid- Aib OH (NPA-Aib-OH) 5.

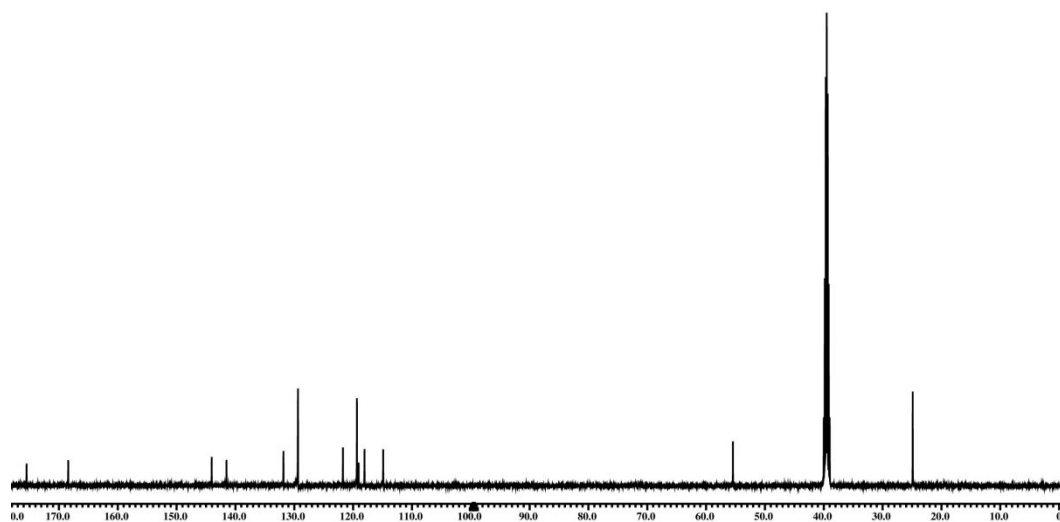

**Figure S13.** <sup>13</sup>C NMR (125 MHz, DMSO-d<sub>6</sub>) spectrum of Fenamic acid- Aib OH (NPA-Aib-OH) 5.

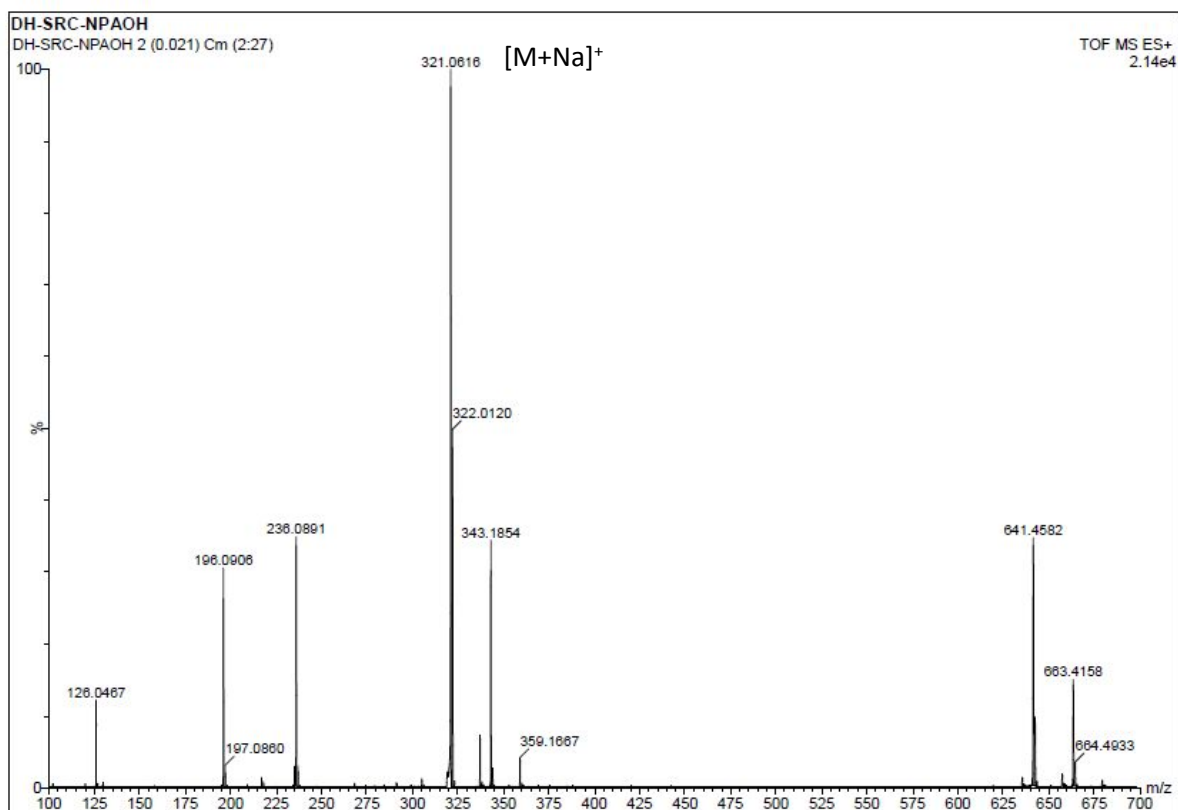

Figure S14. Mass spectrum of Fenamic acid- Aib OH (NPA-Aib-OH) 5.

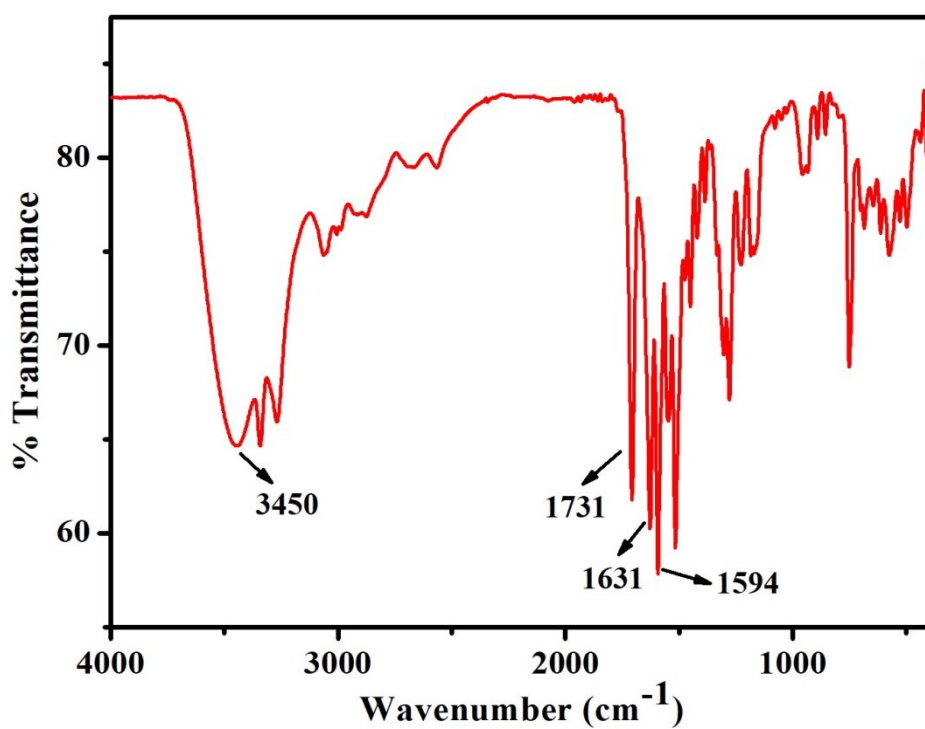

Figure S15. FT-IR spectrum of Fenamic acid- Aib OH (NPA-Aib-OH) 5.

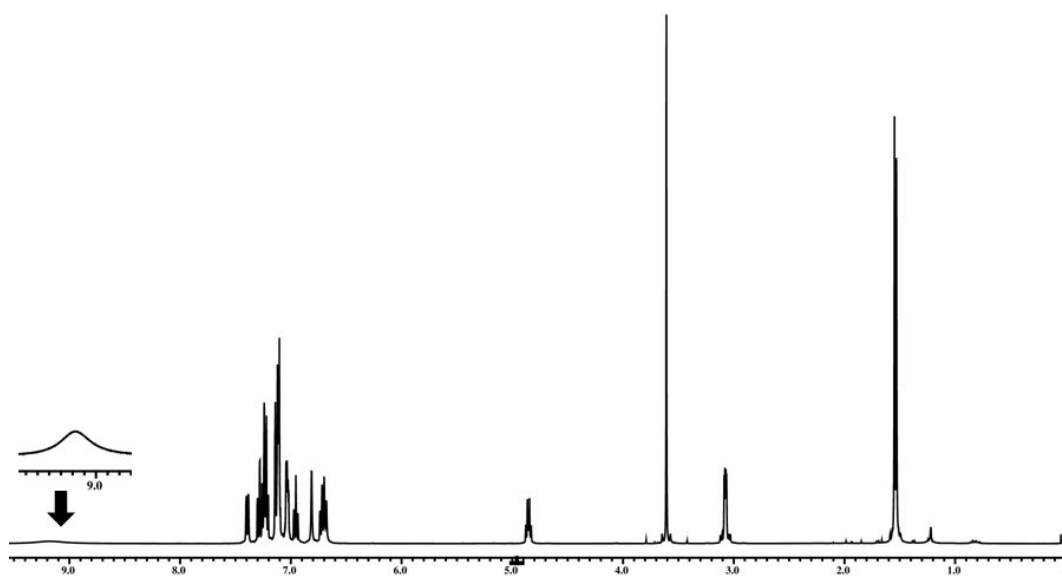

**Figure S16.**  $^1\text{H}$  NMR (400 MHz,  $\text{CDCl}_3$ ) spectrum of Fenamic acid- Aib-Phe OMe 1.

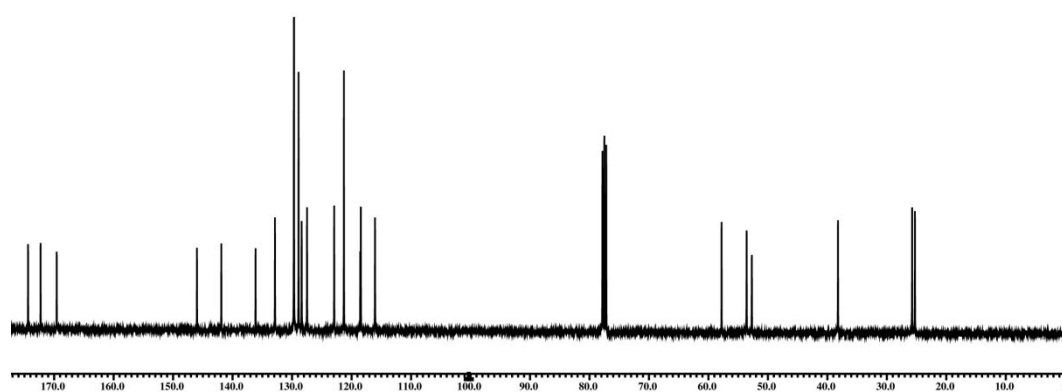

**Figure S17.**  $^{13}\text{C}$  NMR (100 MHz,  $\text{CDCl}_3$ ) spectrum of Fenamic acid- Aib-Phe OMe 1.

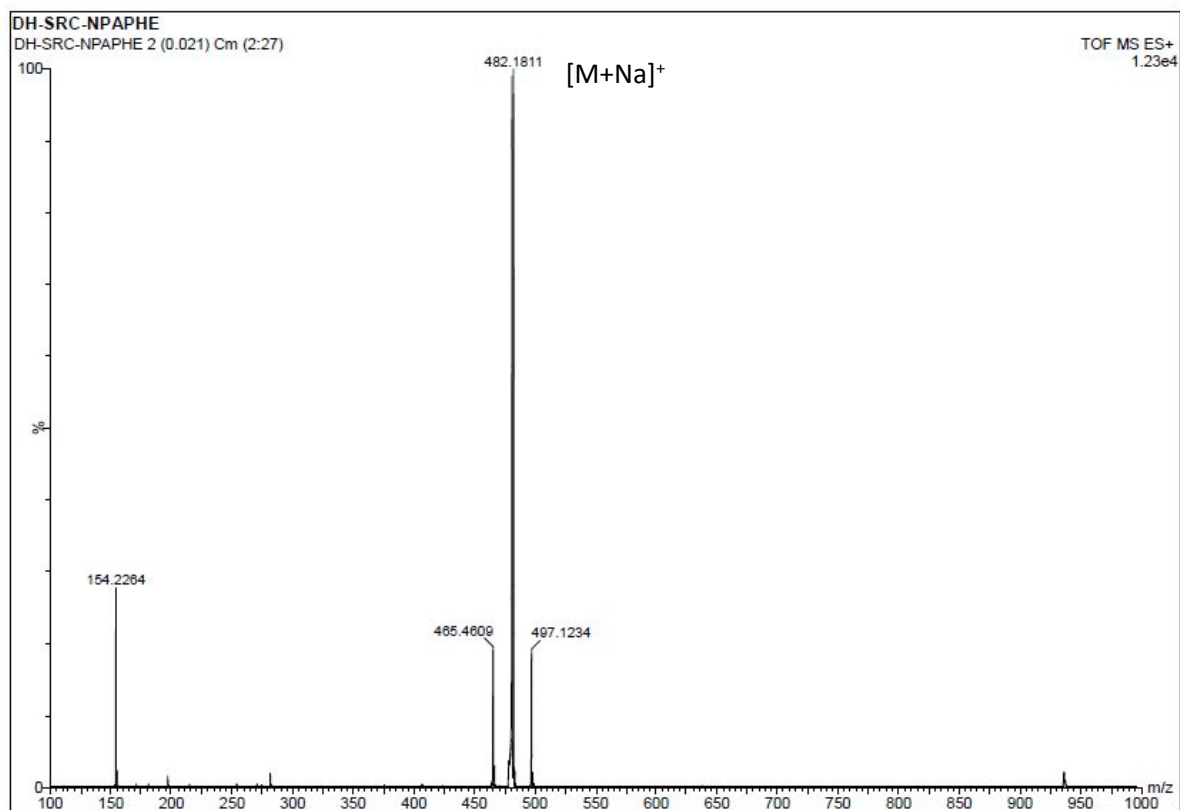

**Figure S18.** Mass spectrum of Fenamic acid- Aib-Phe OMe 1.

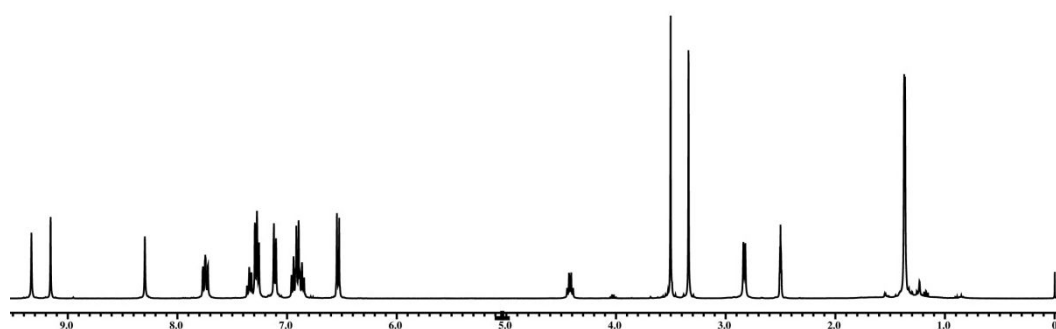

**Figure S19.**  $^1\text{H}$  NMR (400 MHz, DMSP- $d_6$ ) spectrum of Fenamic acid- Aib-Tyr OMe 2.

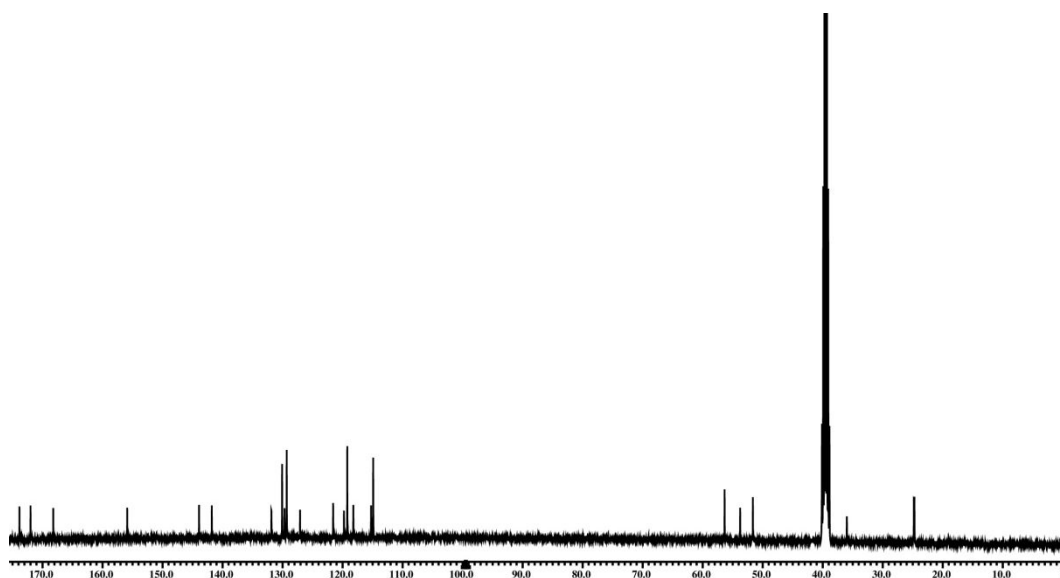

**Figure S20.**  $^{13}\text{C}$  NMR (100 MHz,  $\text{DMSO-d}_6$ ) spectrum of Fenamic acid- Aib-Tyr OMe 2.

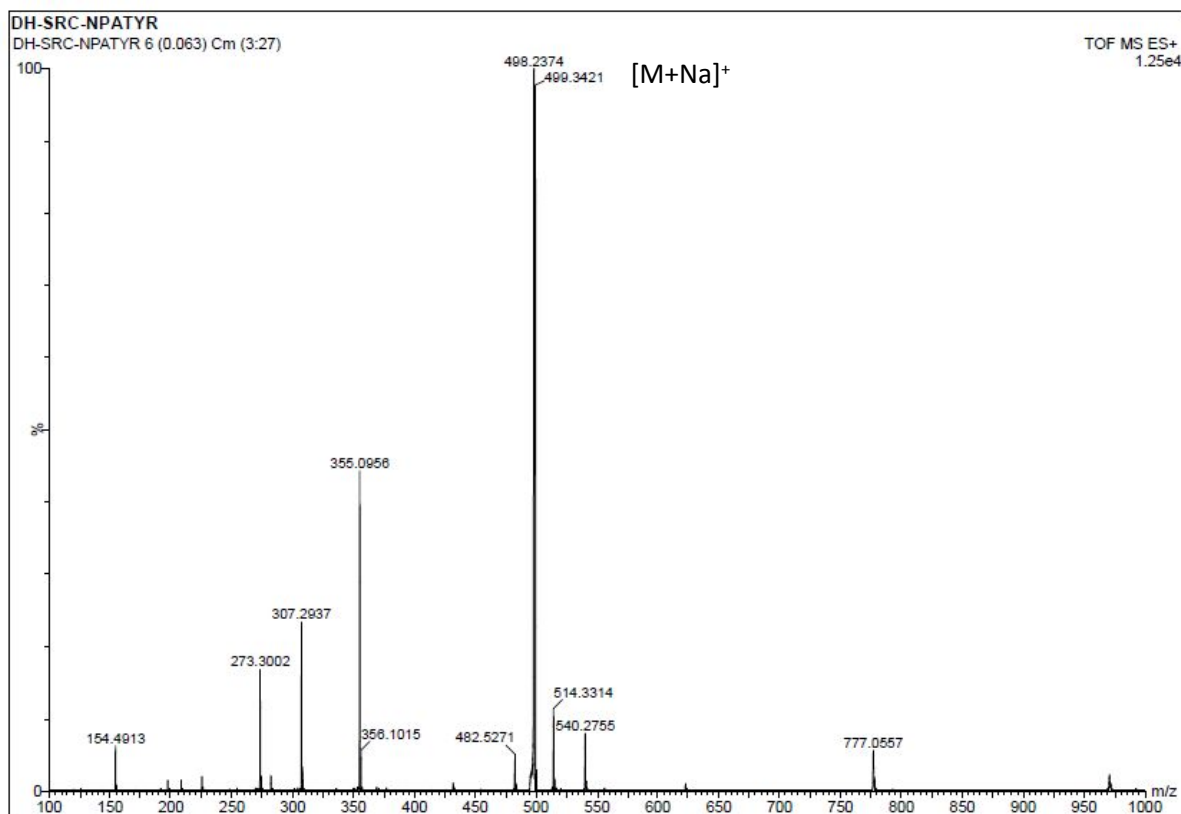

**Figure S21.** Mass spectrum of Fenamic acid- Aib-Tyr OMe 2.

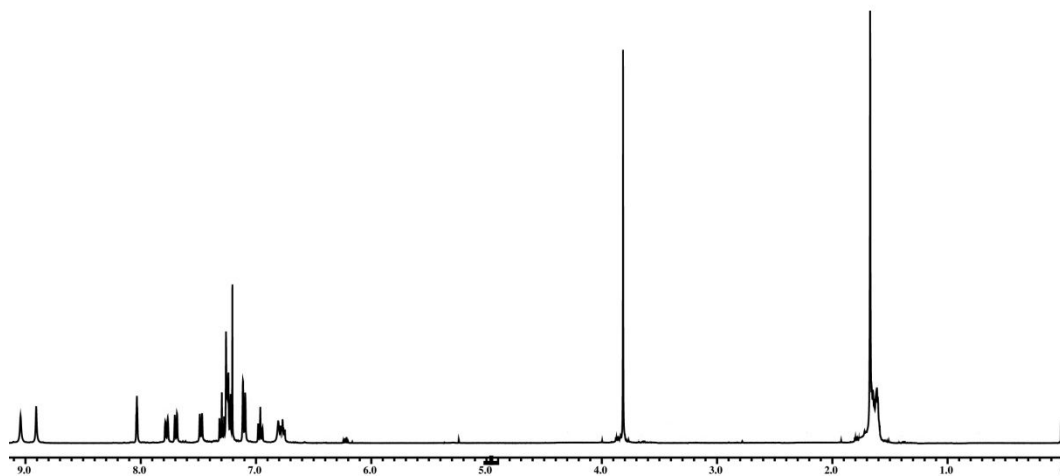

**Figure S22.** <sup>1</sup>H NMR (400 MHz, CDCl<sub>3</sub>) spectrum of Fenamic acid- Aib-Maba OMe **3**.

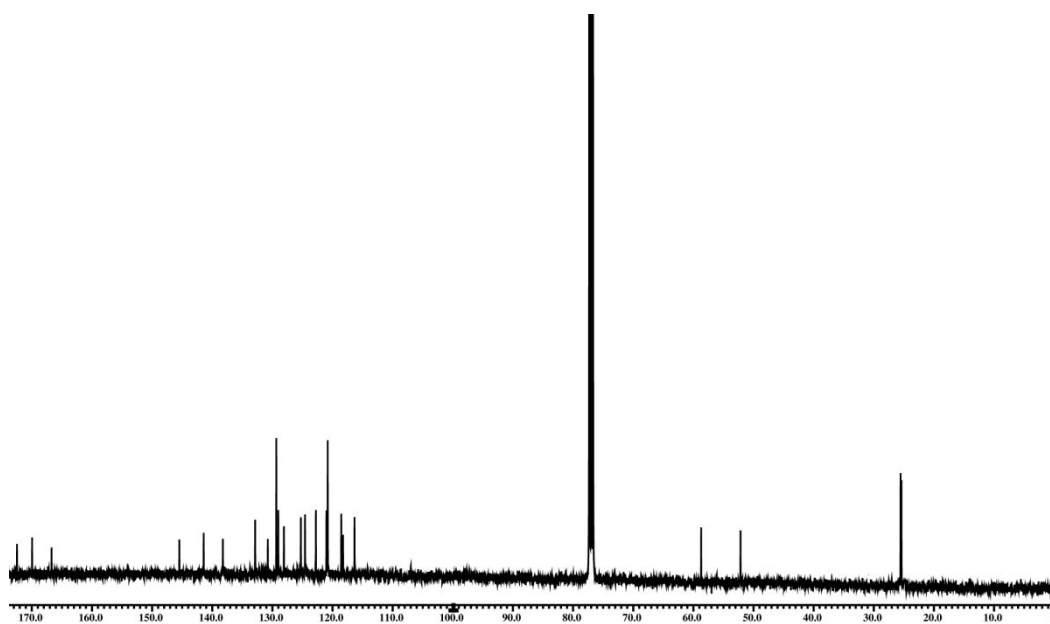

**Figure S23.** <sup>13</sup>C NMR (100 MHz, CDCl<sub>3</sub>) spectrum of Fenamic acid- Aib-Maba OMe **3**.

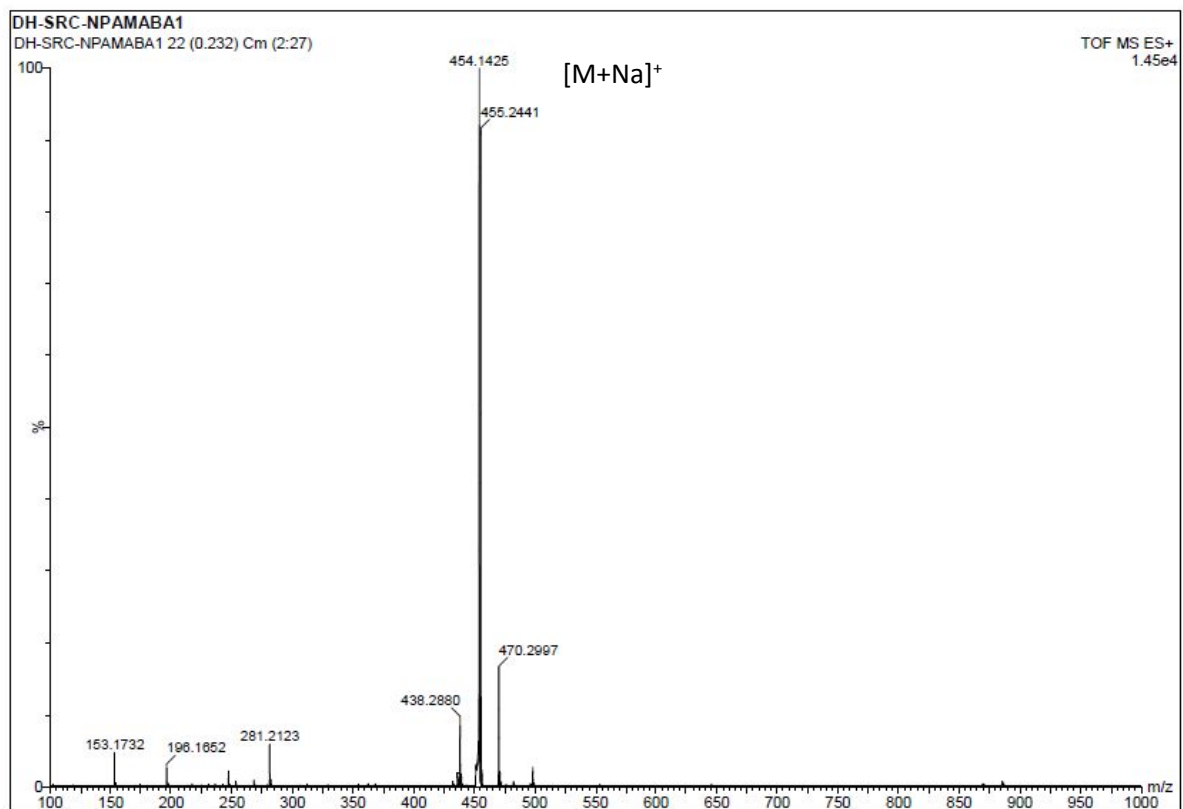

**Figure S24.** Mass spectrum of Fenamic acid- Aib-Maba OMe **3**.
